# Supplementary material for: An insight into perceptions of general pathologists about the need for oral pathology services: An observational study
Source: PubMed Central journal article supplement — SAGE Open Med. 2023 Sep 25;11:20503121231200758. doi: 10.1177/20503121231200758 (PMC10521304; doi:10.1177/20503121231200758), 2023-09-25
Supplement: sj-pdf-1-smo-10.1177_20503121231200758.pdf [file sj-pdf-1-smo-10.1177_20503121231200758.pdf]

# **The opinion of general pathologists about the need for oral pathology services**

## Voluntary Participation Statement:

Your participation in this study is voluntary. You have the right to decline to answer any questions or withdraw from the questionnaire at any time without any negative consequences. Your decision to participate or not will not affect your relationship with any professional organizations or individuals.

## Consent Statement:

By continuing with this questionnaire, you indicate your informed consent to participate. You understand the nature of the study and agree to answer the questions to the best of your knowledge and ability. Your responses will be treated with strict confidentiality and used solely for research purposes.

## Confidentiality Statement:

All information provided in this questionnaire will be kept strictly confidential. Your responses will be anonymized, and no personally identifiable information will be disclosed or published. The collected data will be used for research purposes only and will be reported in aggregate form.

## Data Usage Statement:

The data collected from this questionnaire will be used to analyze and understand the opinions of general pathologists regarding the need for oral pathology services. The results may be used for academic or professional presentations, publications, or other research-related activities. However, your individual responses will remain anonymous and will not be linked back to you.

If you have any concerns or questions regarding this questionnaire, you can contact the researcher at [afsheenmaqsood.bumdc@bahria.edu.pk](mailto:afsheenmaqsood.bumdc@bahria.edu.pk)

Thank you for your valuable participation!

1. Designation:

- Professor
- Associate Professor
- Assistant Professor
- Senior Resident
- Private Practitioner

2. Location of the job (Country, city, town or remote area) -----

3. Work experience (in years)

- 0–5 yr
- 6–10 yr
- 11–15 yr
- 16 yr

4. Prior to receiving this questionnaire, were you aware of the existence of specialist oral pathologists?

- Yes
- No

5. Do you perceive a need for pathologists who specialize in lesion of the teeth, jaws, oral mucosa and salivary glands?

- Yes
- No

6. What approximately is the total number of specimens received by your department in a year?

- < 2000
- 2000 - 5000
- 5000 - 10,000
- > 10,000

7. Approximately how many dental, oral mucosal, salivary and jaw specimen does your department receive in a year?

- < 50
- 50 - 100
- 100 - 300
- 300 - 500
- 500 - 1000
- > 1000

8. Do you ever refer cases to oral pathologists?

- Yes
- No

9. If YES, how many cases have you referred in the last year?

- < 5
- > 10

10. Was this a similar number to previous years?

- Yes, similar
- No, more

11. Usual referral of odontogenic cyst?

- No
- Yes

12. Usual referral of odontogenic tumors?

- No
- Yes

13. Would you consider a short term posting of your postgraduates in oral pathology?

Yes

No

14. Do you feel an oral pathologist must be a part of the team involved in diagnosis of complex head and neck pathologies referred to general histopathology laboratories?

Yes

No

---
